# Supplementary material
Source: publisher figshare collection journal article supplement (https://sage.figshare.com/ndownloader/files/15342302)
Supplement: Supplementary file 1 [file 15342302]

## Appendix 1: Summary of the Student Survey (translated from Spanish)

### Multiple Choice Answer Options:

\* = Yes, definitely, Yes, probably, Maybe, No, not really, Not at all

# = Everything, The majority, about half, Not much, none

1. What Natural Science Department or Major do you belong to and what is your academic year?
2. Do you plan to continue to graduate studies?  
What career do you have in mind? \*
3. After finishing your studies, where do you plan to work?
4. How important is it that you understand and write scientific material in English in the career you plan to dedicate yourself to in the future? \*
5. Would you consider participating in an internship, workshop, short course, research experience, academic trip, or another academic program in the United States or a location where the first language is English? \*
- What academic activities do you hope to participate in? (open response)
6. What prevents your participation in such an internship, workshop, short course, research experience, academic trips, or other program?
7. Identify for each category (reading, writing, listening, speaking) your abilities in English? #
8. Do you use English to communicate frequently in an oral and a written form in an academic context? Same question for a casual context (formal and non-formal)? \*
9. Do you feel confident communicating in English (listening and talking) with other people whose first language is English? \*
10. In your experience, do you find it difficult studying and understanding terms in a textbook or any other material written in English? \*
11. How do you feel with the use of translated textbooks (from English to Spanish)?

-I need it, I prefer it, I use it, I prefer it but don't use it, I don't need it

12. From a choice of: grammar, orthography, vocabulary, sentence structure, paragraph composition, citations and the correct use of a style for a format or specific audience, mark all the categories in which you have difficulty.

13. Identify the type of scientific reading material written in English that has been assigned to you.

-Textbooks, PowerPoints, handouts, online class platforms, instructions for assignments or classwork, instructions for quizzes or tests, informative articles, theoretical essays, research papers, posters, opinion articles, none of the above

14. From the following options, select the assignments that you have done in your classes which had to be written in English.

-Lab notebook, theoretical essays, lab reports or research papers, preparation for oral reports, posters, reviews of assigned reading material, questions for short response answers, responses to assignments or classwork, responses in quizzes or tests, none of the above

15. As an undergraduate student of the Natural Sciences in UPR-Cayey, do you think you would benefit from a course that improves skills in the reading and comprehension of material written in English? \*
16. As an undergraduate student of the Natural Sciences in UPR-Cayey, do you think you would benefit from a course that improves skills in the composition and editing of scientific material written in English, such as lab reports and assignments? \*
17. If the course that attends to these needs were to be offered, would you enroll in it? \* (If you chose no) Why not?
18. Which skills would you like to improve in English? (open response)
19. What would you like to learn in courses dedicated to writing scientific material and dedicated to reading scientific material for undergraduates' studies of Natural Sciences in UPR Cayey? (open response)
20. Do you have some recommendations, comments or suggestions that you want to provide to the English department for the development of these courses? (open response)

## Appendix 2: Summary of the Faculty Survey

### Multiple Choice Answer Options:

\* = Priority, Important, Not so much

^ = Yes, definitely, Yes, probably, Maybe, No, not really, Not at all

# = Everything, The majority, about half, Not much, none

1. For which department do you offer classes or workshops?
2. What is your own specialization or sub-discipline?
3. Do you think undergraduate students of the Natural Sciences at UPR-Cayey would benefit from dedicated courses that improved their skills in the reading and comprehension of material written, and their skills in composing and editing scientific material such as lab reports and assignments written in English? ^
4. In your discipline, and to the best of your knowledge, do the majority of professions (in academia or industry) require high levels of competency in writing and in reading material written in English? ^
5. In your classes, is it beneficial for students to have high levels of competency in English? ^
6. How much of the reading material, written work and oral work you assign and assess in your class is in English or requires students to write and present ideas in English? #
7. How much of your own communication with the class (either spoken or written) is in English? #
8. Which types of reading material written in English do you require students to read and comprehend in your classes? Check all that apply.

-Textbooks, PowerPoints, handouts, online class platforms, instructions for assignments or classwork, instructions for quizzes or tests, informative articles, theoretical essays, research papers, posters, opinion articles, none of the above

9. Which types of assignments do you require students to write in English in your classes? Check all that apply and add any others in the space provided.

-Lab notebook, theoretical essays, lab reports or research papers, preparation for oral reports, posters, reviews of assigned reading material, questions for short response answers, responses to assignments or classwork, responses in quizzes or tests, none of the above

10. In your opinion, what feature of their writing (in English) do your students have the most problems with? Check all that apply.

-Grammar, spelling, vocabulary, structure of sentences, development of paragraph, using and citing sources correctly, using the correct style for a specific format or audience

11. Which of the following types of writing do you feel are most important for your undergraduate students to master writing in English?

-Personal writing, lab reports or research papers, analytical writing, scripting and preparing notes for presentations, composing scientific posters, short answer based on reading comprehension, answers for quizzes or tests

12. Rate the importance of each skills for a proposed course in Scientific Reading and Comprehension in English in terms of what you feel is most important for your students. Add any others in the space provided. \*

- Read at 200 words per min with approx. 75% comprehension, build specialized vocabulary for scientific disciplines, use techniques to improve reading efficiency, identify good models with effective writing and organization, use syntax and knowledge of discourse to interpret texts, develop editing techniques and target common errors, access, evaluate and cite physical and electronic material

13. Rate the importance of each skills for a proposed course in Scientific Writing in English in terms of what you feel is most important for your students. Add any others in the space provided. \*

-Choosing a style appropriate for format and audience, generating ideas & getting started with templates, eliminating unnecessary complexity and wordiness, developing cohesive sentences, paragraphs, and texts, developing confidence by mastering tone, revision for editing and proofreading, collaborating with others on drafting and revising writing

14. What, in your opinion, should be the main focus of dedicated courses in Scientific Reading and Scientific Writing for undergraduate students of the Natural Sciences at UPR-Cayey? (open response)
